# Supplementary material for: Imposing control on self-assembly: rational design and synthesis of a mixed-metal, mixed-ligand coordination cage containing four types of component
Source: PubMed Central journal article supplement (PMC5530507; doi:10.1039/c5sc03526k), 2015-10-14
Supplement: SC-007-C5SC03526K-s001.pdf [file SC-007-C5SC03526K-s001.pdf]

# **Imposing control on self-assembly: rational design and synthesis of a mixed-metal, mixed-ligand coordination cage containing four types of component**

**Alexander J. Metherell and Michael D. Ward**

## *Supporting Information*

- 1 Experimental information
- 2 Bond distances (Å) around the metal ions from the crystal structure
- 3 High-resolution electrospray mass spectra of selected signals
- 4 Additional NMR data
- 5 Additional figures of the crystal structure of  $[\text{Ru}_4\text{Cd}_{12}(\text{L}^{\text{ph}})_{12}(\text{L}^{\text{naph}})_{12}](\text{PF}_6)_7(\text{BF}_4)_{25}$

## 1. Experimental information

### *General details*

Metal salts and all organic reagents were purchased from Alfa or Sigma-Aldrich and used as received.  $^1\text{H}$  NMR spectra were recorded on Bruker DRX 500 MHz, Bruker AV-III 400 MHz or AV-1 800 MHz instruments. Low-resolution electrospray mass spectra were recorded on a Micromass LCT instrument. High-resolution electrospray mass spectra were measured on an electron transfer dissociation (ETD) enabled ThermoFisher-Scientific Orbitrap Elite, equipped with an HESI source (ThermoFisher Scientific). UV/Vis absorption spectra were measured on a Cary 50 spectrophotometer.

### *Preparation of $[\text{Ru}_4\text{Cd}_{12}(\text{L}^{\text{ph}})_{12}(\text{L}^{\text{naph}})_{12}](\text{PF}_6)_7(\text{BF}_4)_{25}$*

To a stirred solution of *fac*- $[\text{Ru}(\text{L}^{\text{ph}})_3](\text{PF}_6)_2$  (0.023 g, 0.015 mmol; preparation in ref 1) in nitromethane (10 cm<sup>3</sup>) was added  $[\text{Cd}_3(\text{L}^{\text{naph}})_3](\text{BF}_4)_6$  (0.035 g, 0.015 mmol; preparation in ref. 6, main text). The initially turbid solution became clear after heating at 60 °C for 1 hour, after which the mixture was passed through a membrane filter. Slow diffusion of di-isopropyl ether into the nitromethane solution yielded the complex as large yellow blocks of X-ray quality, which were separated from the mother liquor and washed with di-isopropyl ether. Yield: 0.022 g, 40 %. ESMS (selected peaks):  $m/z$  2835,  $[(\text{Ru}_4\text{Cd}_{12}(\text{L}^{\text{ph}})_{12}(\text{L}^{\text{naph}})_{12})(\text{BF}_4)_{26}(\text{PF}_6)]^{5+}$ ; 2348,  $[(\text{Ru}_4\text{Cd}_{12}(\text{L}^{\text{ph}})_{12}(\text{L}^{\text{naph}})_{12})(\text{BF}_4)_{25}(\text{PF}_6)]^{6+}$ ; 2000,  $[(\text{Ru}_4\text{Cd}_{12}(\text{L}^{\text{ph}})_{12}(\text{L}^{\text{naph}})_{12})(\text{BF}_4)_{24}(\text{PF}_6)]^{7+}$ . UV/Vis in MeCN [ $\lambda_{\text{max}}/\text{nm}$  ( $10^{-3}$   $\epsilon/\text{M}^{-1}$  cm<sup>-1</sup>): 397 (50.3), 287 (577.0), 229 (783.8). Note that the extinction coefficient associated with the Ru-based MLCT absorption at 397 nm is *ca.* four times more intense than for mononuclear *fac*- $[\text{Ru}(\text{L}^{\text{ph}})_3](\text{PF}_6)_2$  (ref. 12, main text).

## 2. Bond distances (Å) around the metal ions from the crystal structure

|               |           |               |           |
|---------------|-----------|---------------|-----------|
| Cd(1)-N(11K)  | 2.298(9)  | Cd(2)-N(11D)  | 2.275(8)  |
| Cd(1)-N(11E)  | 2.313(8)  | Cd(2)-N(31C)  | 2.310(8)  |
| Cd(1)-N(22E)  | 2.327(8)  | Cd(2)-N(42C)  | 2.316(10) |
| Cd(1)-N(22K)  | 2.342(10) | Cd(2)-N(42V)  | 2.329(10) |
| Cd(1)-N(22B)  | 2.345(8)  | Cd(2)-N(22D)  | 2.380(8)  |
| Cd(1)-N(11B)  | 2.358(8)  | Cd(2)-N(31V)  | 2.418(11) |
|               |           |               |           |
| Cd(4)-N(11Q)  | 2.287(9)  | Cd(6)-N(42E)  | 2.278(10) |
| Cd(4)-N(41N)  | 2.298(9)  | Cd(6)-N(31F)  | 2.283(9)  |
| Cd(4)-N(31D)  | 2.317(11) | Cd(6)-N(31E)  | 2.295(11) |
| Cd(4)-N(22Q)  | 2.347(9)  | Cd(6)-N(42F)  | 2.338(9)  |
| Cd(4)-N(42D)  | 2.360(11) | Cd(6)-N(11H)  | 2.357(11) |
| Cd(4)-N(31N)  | 2.377(10) | Cd(6)-N(22H)  | 2.381(12) |
|               |           |               |           |
| Cd(9)-N(11L)  | 2.248(10) | Cd(10)-N(42W) | 2.231(11) |
| Cd(9)-N(11M)  | 2.291(11) | Cd(10)-N(31M) | 2.298(10) |
| Cd(9)-N(22L)  | 2.302(9)  | Cd(10)-N(22T) | 2.315(11) |
| Cd(9)-N(42A)  | 2.309(10) | Cd(10)-N(11T) | 2.321(9)  |
| Cd(9)-N(22M)  | 2.356(10) | Cd(10)-N(31W) | 2.351(13) |
| Cd(9)-N(31A)  | 2.374(11) | Cd(10)-N(42M) | 2.373(11) |
|               |           |               |           |
| Cd(11)-N(42G) | 2.258(13) | Cd(12)-N(42P) | 2.246(10) |
| Cd(11)-N(11R) | 2.284(10) | Cd(12)-N(42R) | 2.269(13) |
| Cd(11)-N(42O) | 2.315(12) | Cd(12)-N(31R) | 2.306(12) |
| Cd(11)-N(31O) | 2.329(10) | Cd(12)-N(31P) | 2.316(12) |
| Cd(11)-N(22R) | 2.340(9)  | Cd(12)-N(31X) | 2.341(13) |
| Cd(11)-N(31G) | 2.412(12) | Cd(12)-N(42X) | 2.374(12) |
|               |           |               |           |
| Cd(14)-N(31J) | 2.257(13) | Cd(15)-N(42I) | 2.221(16) |
| Cd(14)-N(22C) | 2.287(10) | Cd(15)-N(42T) | 2.283(13) |
| Cd(14)-N(31Q) | 2.297(11) | Cd(15)-N(31L) | 2.283(9)  |
| Cd(14)-N(42Q) | 2.303(13) | Cd(15)-N(42L) | 2.329(9)  |
| Cd(14)-N(11C) | 2.321(10) | Cd(15)-N(31T) | 2.364(10) |
| Cd(14)-N(42J) | 2.399(12) | Cd(15)-N(31I) | 2.388(12) |
|               |           |               |           |
| Cd(16)-N(11F) | 2.245(14) | Cd(7)-N(11O)  | 2.293(9)  |
| Cd(16)-N(22F) | 2.297(14) | Cd(7)-N(11P)  | 2.319(10) |
| Cd(16)-N(31K) | 2.312(12) | Cd(7)-N(22P)  | 2.322(10) |
| Cd(16)-N(42K) | 2.330(11) | Cd(7)-N(42U)  | 2.339(10) |
| Cd(16)-N(42S) | 2.337(16) | Cd(7)-N(22O)  | 2.359(9)  |
| Cd(16)-N(31S) | 2.41(2)   | Cd(7)-N(31U)  | 2.360(12) |
|               |           |               |           |
| Ru(3)-N(11V)  | 2.022(9)  | Ru(5)-N(22J)  | 2.036(9)  |
| Ru(3)-N(22V)  | 2.032(8)  | Ru(5)-N(11G)  | 2.043(9)  |
| Ru(3)-N(22A)  | 2.038(9)  | Ru(5)-N(31H)  | 2.046(11) |
| Ru(3)-N(42B)  | 2.075(8)  | Ru(5)-N(22G)  | 2.058(10) |
| Ru(3)-N(31B)  | 2.083(9)  | Ru(5)-N(11J)  | 2.074(9)  |
| Ru(3)-N(11A)  | 2.089(9)  | Ru(5)-N(42H)  | 2.083(9)  |
|               |           |               |           |
| Ru(8)-N(22S)  | 2.029(10) | Ru(13)-N(11I) | 1.988(13) |
| Ru(8)-N(22U)  | 2.059(9)  | Ru(13)-N(22N) | 2.053(10) |
| Ru(8)-N(11W)  | 2.072(10) | Ru(13)-N(11N) | 2.071(12) |
| Ru(8)-N(22W)  | 2.083(9)  | Ru(13)-N(22X) | 2.074(9)  |
| Ru(8)-N(11U)  | 2.100(10) | Ru(13)-N(11X) | 2.098(11) |
| Ru(8)-N(11S)  | 2.108(8)  | Ru(13)-N(22I) | 2.109(11) |

### 3. High-resolution electrospray mass spectra of selected signals

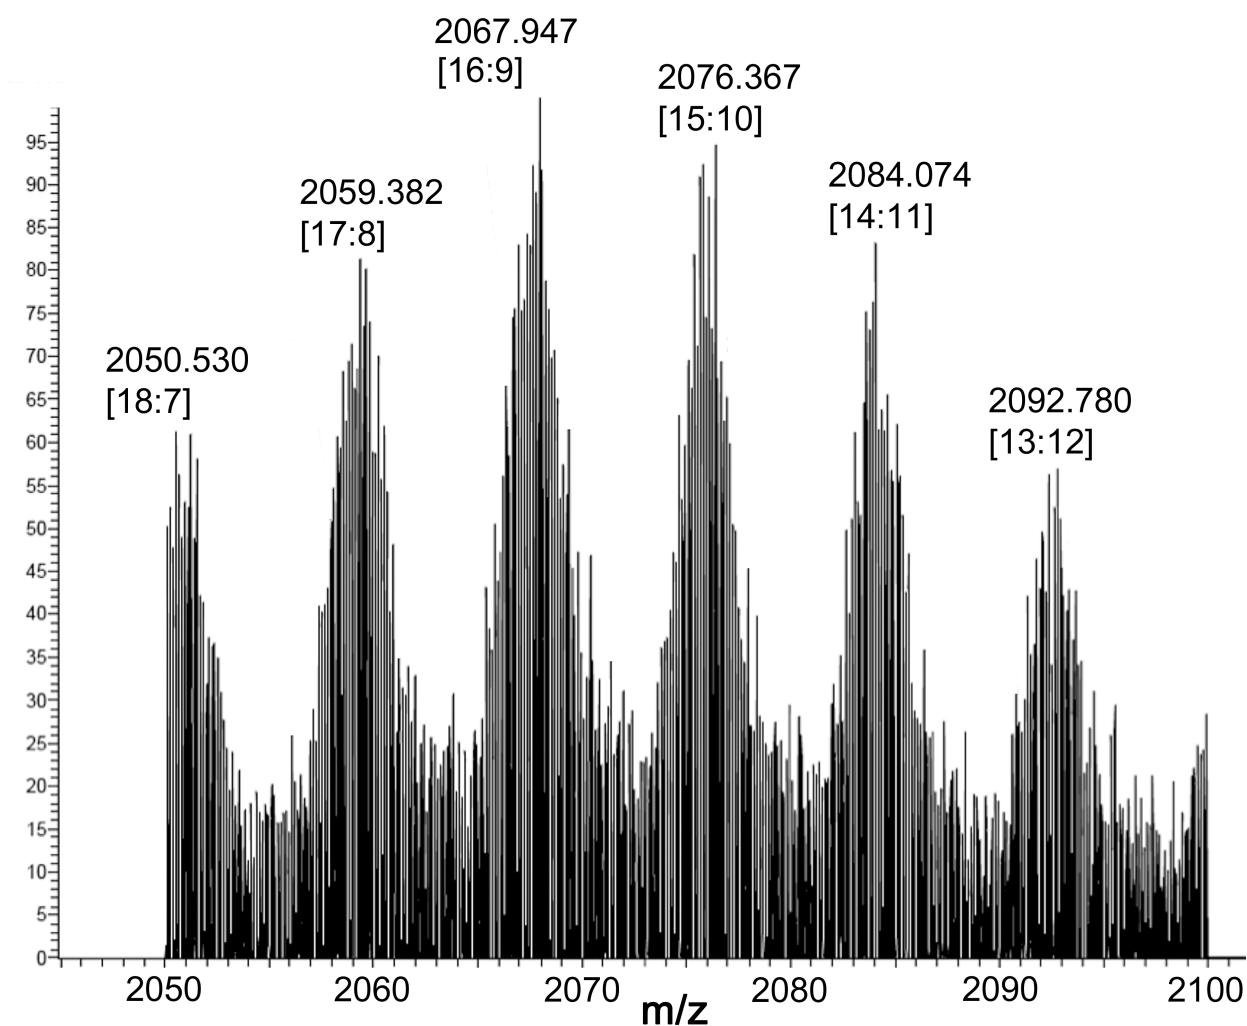

**Figure S1** High resolution ES mass spectrum of the cage in the region showing 7+ ions, showing the series of signals for  $\{[\text{Ru}_4\text{Cd}_{12}(\text{L}^{\text{ph}})_{12}(\text{L}^{\text{naph}})_{12}](\text{BF}_4)_x(\text{PF}_6)_y\}^{7+}$  where  $x + y = 25$ . For each cluster the values in square brackets [x:y] are the numbers of each type of anion.

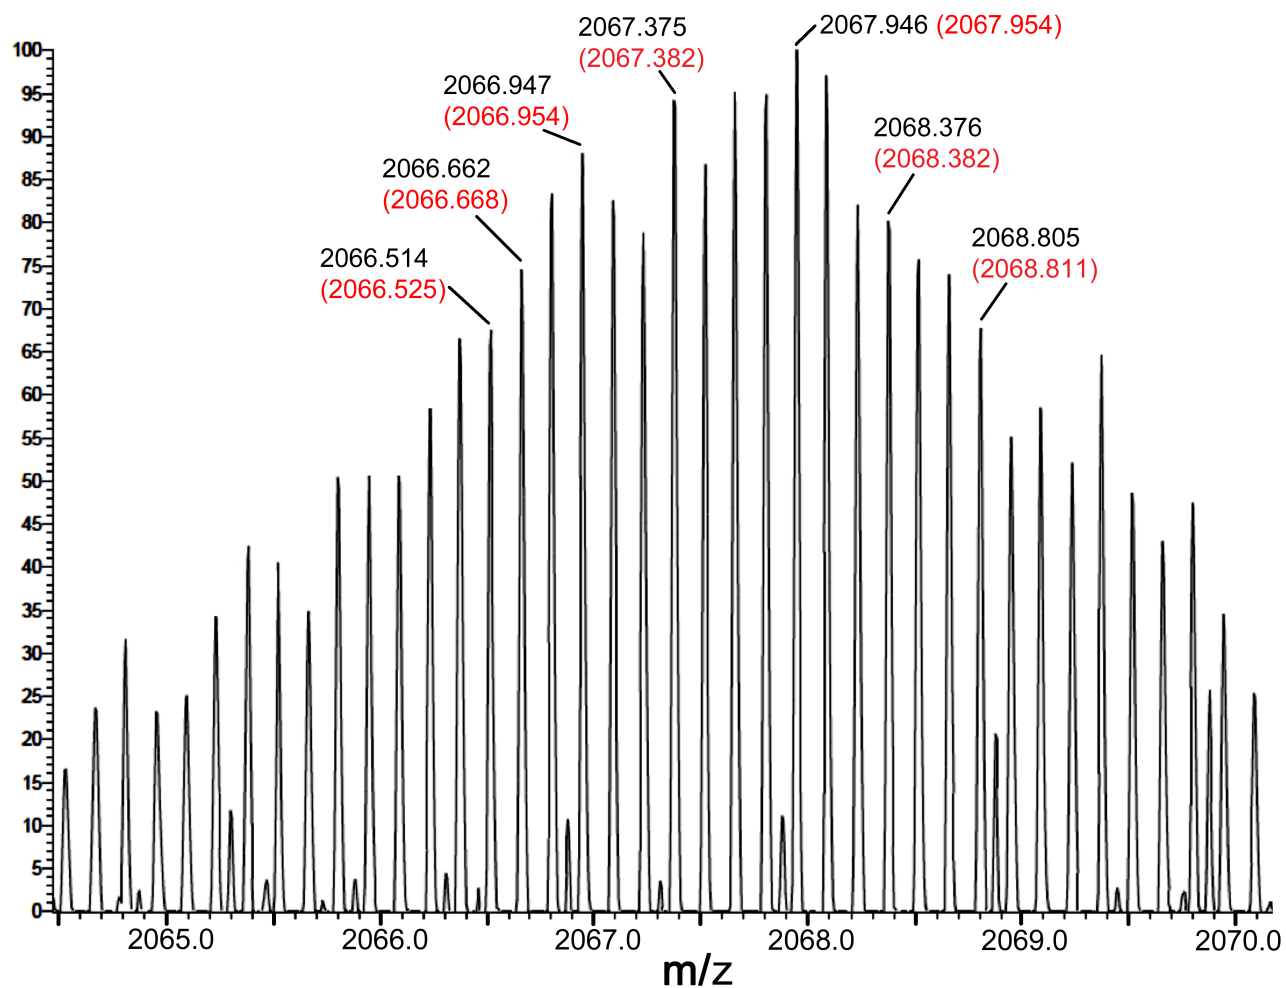

**Figure S2** Expansion of the region in Fig. S1 corresponding to the species  $\{[\text{Ru}_4\text{Cd}_{12}(\text{L}^{\text{ph}})_{12}(\text{L}^{\text{nap}^{\text{h}}})_{12}](\text{BF}_4)_{16}(\text{PF}_6)_9\}^{7+}$ , showing the  $1/7$  mass unit isotopic spacing and the good agreement with calculated  $m/z$  values (shown in red).

#### 4. Additional NMR data

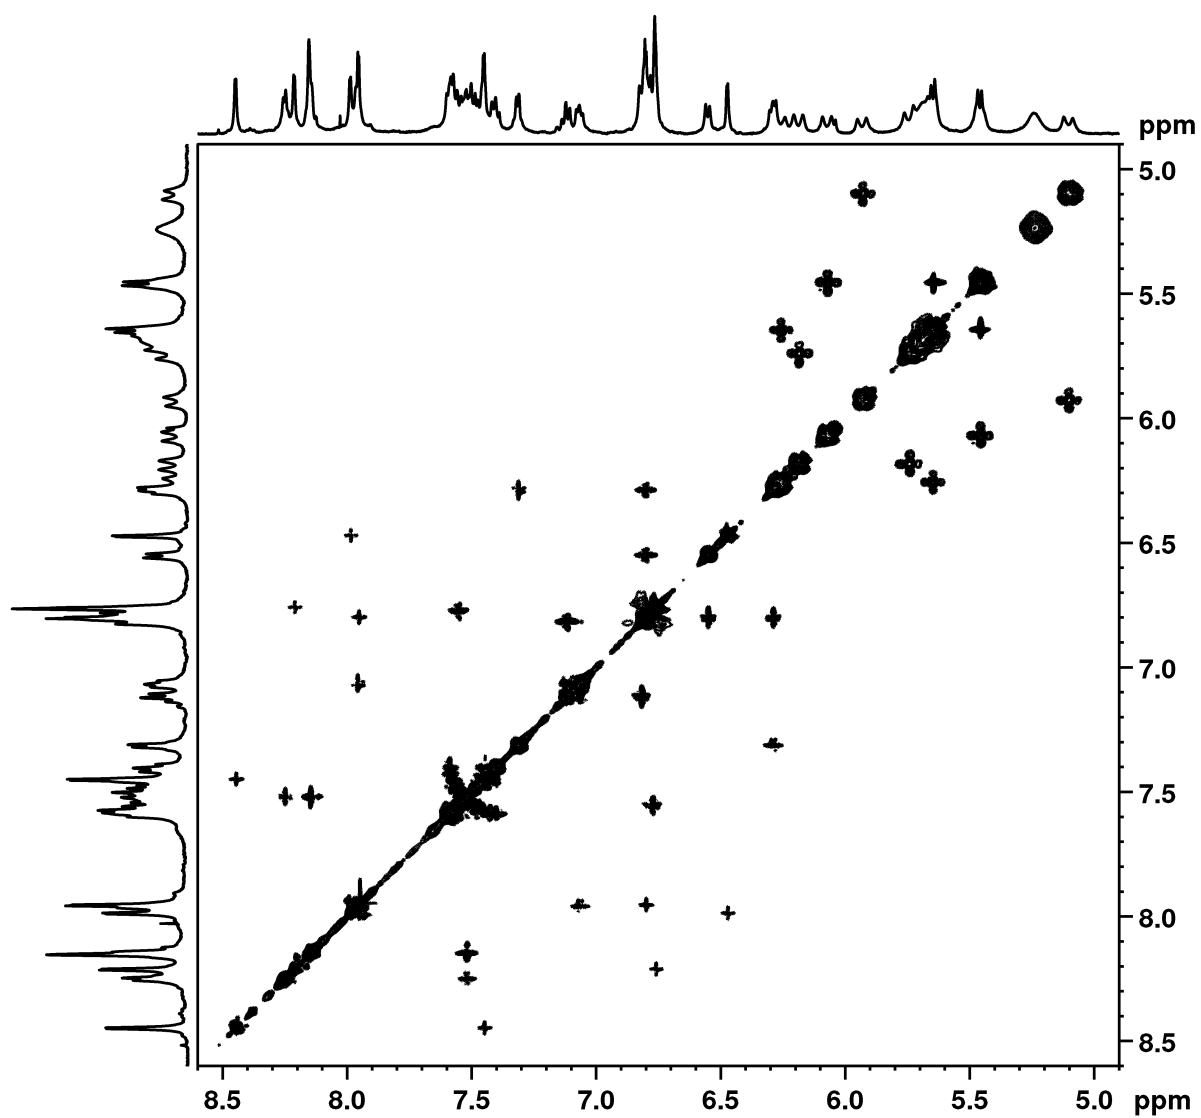

**Figure S3** COSY spectrum (500 MHz, 298K) of  $[\text{Ru}_4\text{Cd}_{12}(\text{L}^{\text{ph}})_{12}(\text{L}^{\text{nap}^{\text{h}}})_{12}](\text{PF}_6)_7(\text{BF}_4)_{25}$  in  $\text{CD}_3\text{NO}_2$ .

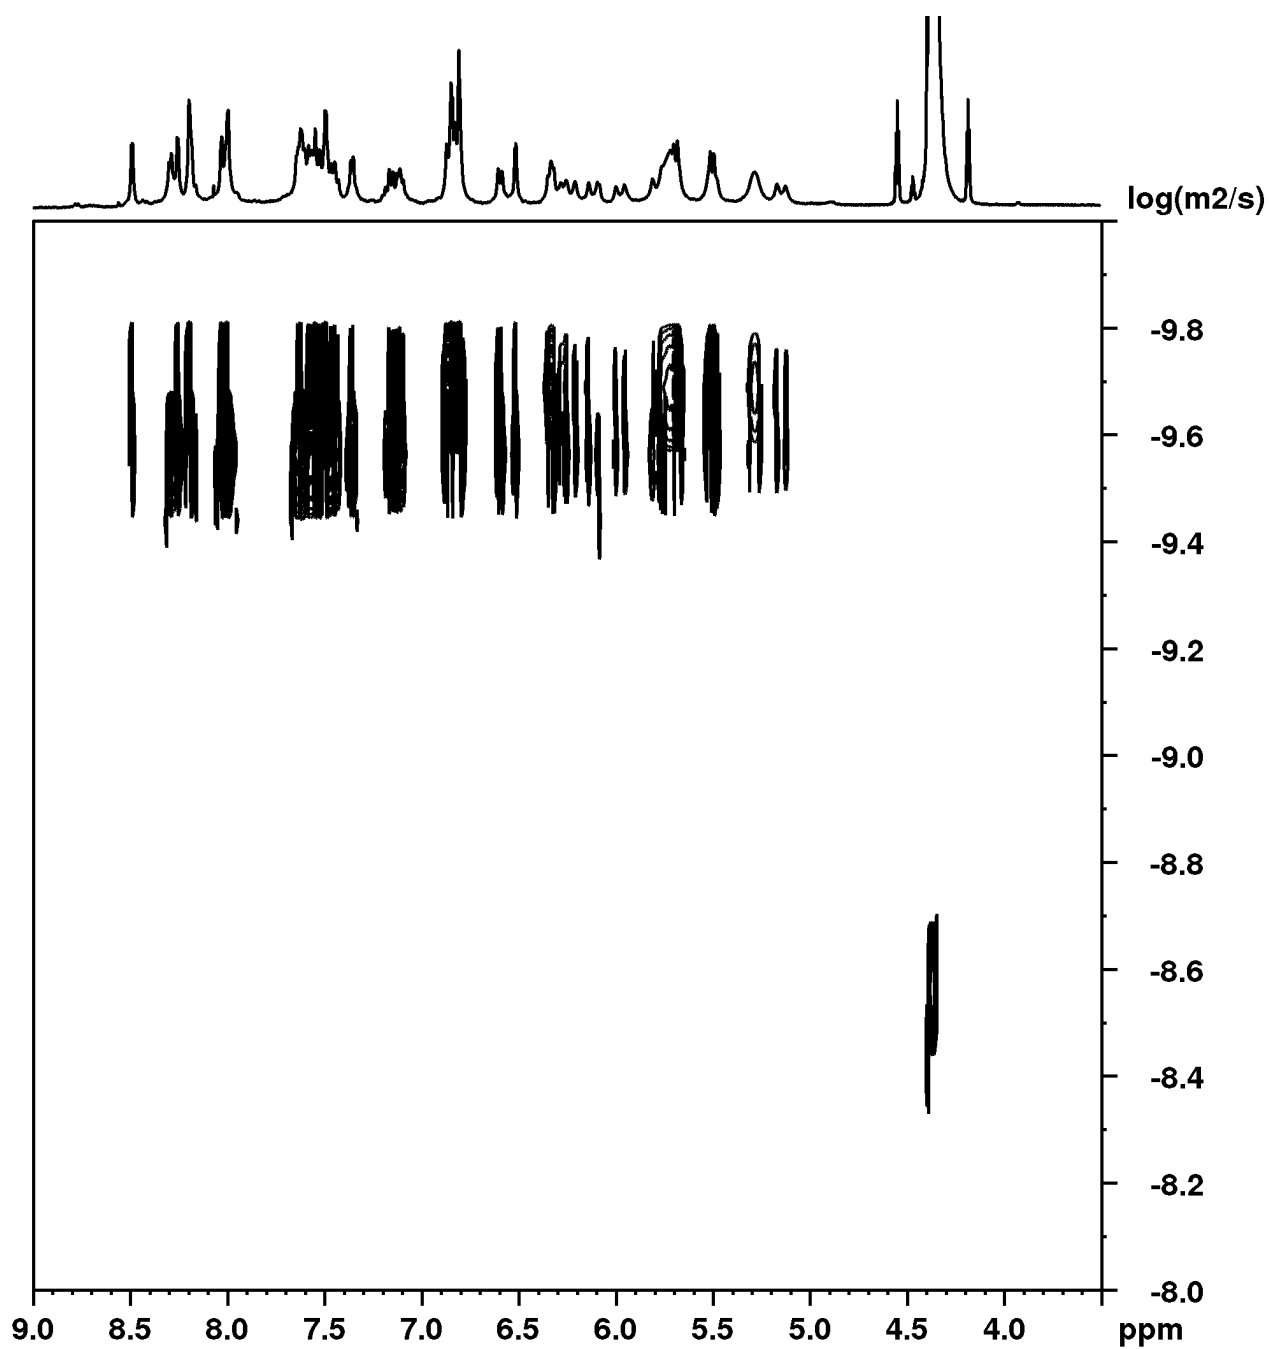

**Figure S4** DOSY spectrum (400 MHz, 298K) of  $[Ru_4Cd_{12}(L^{ph})_{12}(L^{naph})_{12}](PF_6)_7(BF_4)_{25}$  in  $CD_3NO_2$ .

**5. Additional figures of the crystal structure of  $[\text{Ru}_4\text{Cd}_{12}(\text{L}^{\text{ph}})_{12}(\text{L}^{\text{naph}})_{12}]$   
 $(\text{PF}_6)_7(\text{BF}_4)_{25}$**

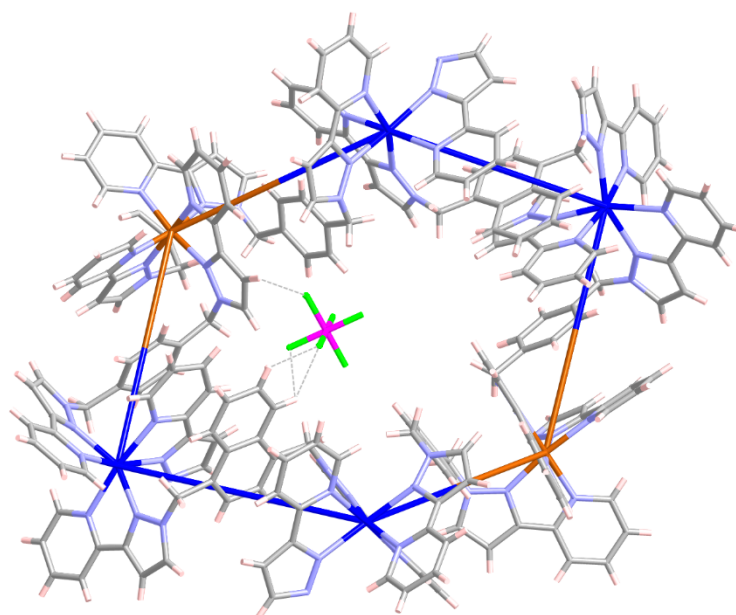

**Figure S5** View of one of the large  $\text{Ru}_2\text{Cd}_4$  windows of  $[\text{Ru}_4\text{Cd}_{12}(\text{L}^{\text{ph}})_{12}(\text{L}^{\text{naph}})_{12}]$   
 $(\text{PF}_6)_7(\text{BF}_4)_{25}$ , with an associated  $[\text{PF}_6]^-$  anion forming C-H...F contacts with  
the surface of the cage.

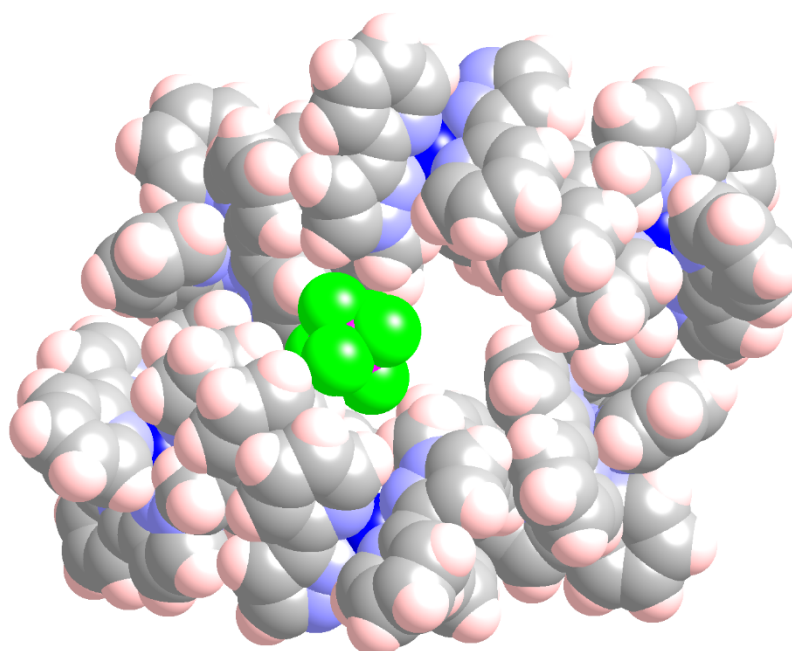

**Figure S6** Space-filling version of Fig. S5



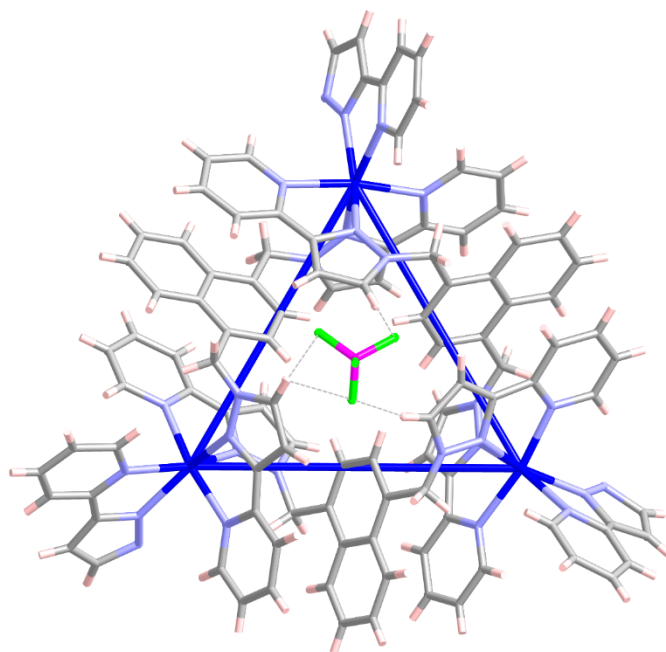

**Figure S7** View of one of the Cd<sub>3</sub> windows, with an associated [BF<sub>4</sub>]<sup>-</sup> anion forming C-H...F contacts with the surface of the cage.

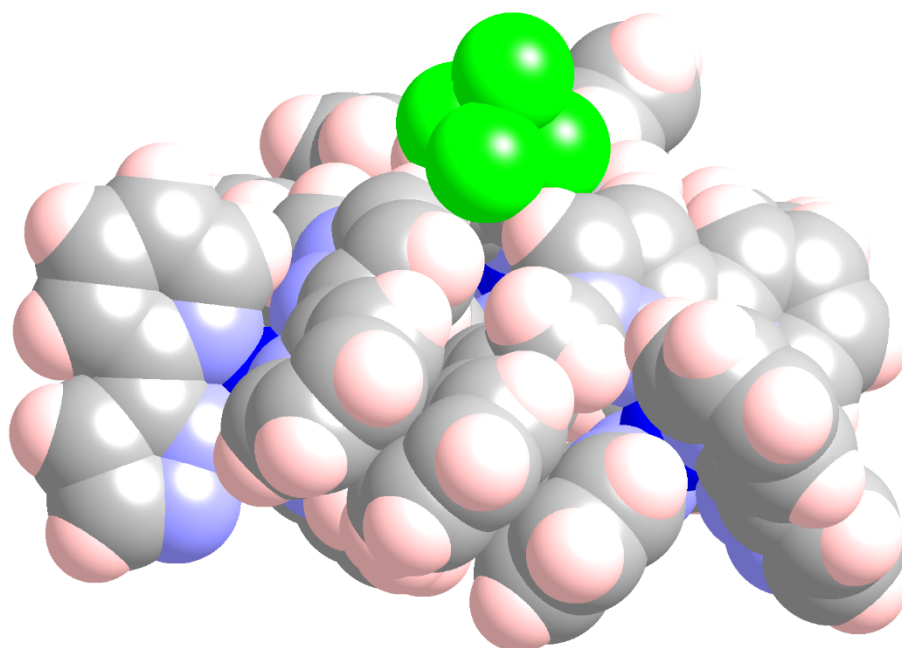

**Figure S8** Spacefilling view of Fig. S7 from a different orientation.
